# Supplementary material
Source: publisher figshare collection journal article supplement (https://sage.figshare.com/ndownloader/files/22003737)
Supplement: Supplementary file 1 [file 22003737]

## Text 1 Supplement

Two pieces of information are provided in this online appendix. The first is a sample of coding for the initiatives in the 2004 general election (Table A1). The second piece is results from the models testing the pivotal politics model.

**Table 1 Supplement. Sample of Coding for Initiatives, 2004 General Election**

| Proposition<br># | Title                                                                                                                                                   | Coding  |
|------------------|---------------------------------------------------------------------------------------------------------------------------------------------------------|---------|
| 61               | Children’s Hospital Projects. Grant Program. Bond Act. Initiative Statute.                                                                              | Earmark |
| 62               | Elections. Primaries. Initiative Constitutional Amendment and Statute.                                                                                  | NI      |
| 63               | Mental Health Services Expansion, Funding. Tax on Personal Incomes Above \$1 Million. Initiative Statute.                                               | Earmark |
| 64               | Limits on Private Enforcement of Unfair Business Competition Laws. Initiative Statute.                                                                  | NI      |
| 65               | Local Government Funds, Revenues. State Mandates. Initiative Constitutional Amendment.                                                                  | Earmark |
| 66               | Limitations on “Three Strikes” Law. Sex Crimes. Punishment. Initiative Statute.                                                                         | NI      |
| 67               | Emergency Medical Services. Funding. Telephone Surcharge. Initiative Constitutional Amendment and Statute.                                              | Earmark |
| 68               | Non-Tribal Commercial Gambling Expansion. Tribal Gaming Compact Amendments. Revenues, Tax Exemptions. Initiative Constitutional Amendment and Statutes. | NI      |
| 69               | DNA Samples. Collection. Database. Funding. Initiative Statute.                                                                                         | Earmark |
| 70               | Tribal Gaming Compacts. Exclusive Gaming Rights. Contributions to State. Initiative Constitutional Amendment and Statute.                               | NI      |
| 71               | Stem Cell Research. Funding. Bonds. Initiative Constitutional Amendment and Statute.                                                                    | Earmark |

Note: This list is taken from the Table of Contents for the 2004 General Election Voter Information Guide. It can be found at the UC Hastings Ballot Measure Database, [https://repository.uchastings.edu/ca\\_ballot\\_pamphlets/](https://repository.uchastings.edu/ca_ballot_pamphlets/). NI = Not included.

To test the pivotal politics model of initiative use, separate models were estimated and are presented in Table A2 (Columns 1-4) with the additional interval variables from Boehmke, Osborn, and Schilling (2015). The results provide additional support for the pivotal politics model.

In Column 1, both the Filibuster and Veto Intervals are significant and positive. For the Filibuster Interval, moving from the mean to one standard deviation above the mean results in 2 more initiative earmarks on the ballot.<sup>1</sup> For the Veto Interval, across the same range of values, the number of initiatives increases by 1.6. In Column 2, the Gridlock Interval is also significant and positive. A change from the mean to one standard deviation above the mean produces 1.6 more initiatives.

The interval variables are also significant and positive in the tax cut models in Columns 3 and 4. A one standard deviation change above the mean of the Filibuster Interval leads to 8 more tax cut initiatives on the ballot. Across the same range of values, the Veto Interval yields 2.6 more initiatives. The substantive effects for the Gridlock Interval (Column 4) appear extremely large. A change from the mean to one standard deviation above it results in 135 more initiatives. There is not a good explanation for this unusually large effect. Alternative models were tested to determine if the Poisson was not the correct model, but a Vuong test revealed that it is.

## Notes

1. One standard deviation below the mean for this variable is not used to calculate substantive effects because the value would be negative and there are no negative values for this variable.

To maintain consistency in the interpretation of the interval variables, a change from the mean to one standard deviation above the mean is used for all interval variables.
